# Supplementary material for: Sociodemographic Differences in the Dietary Quality of Food-at-Home Acquisitions and Purchases among Participants in the U.S. Nationally Representative Food Acquisition and Purchase Survey (FoodAPS)
Source: PubMed Central journal article supplement (PMC7468991; doi:10.3390/nu12082354), 2020-08-07
Supplement: nutrients-12-02354-s001.pdf [file nutrients-12-02354-s001.pdf]

Table S1 – Unadjusted model examining mean HEI scores by SNAP and food security status (n=3960)

| HEI Category          | Food Insecure          |                        | Food Secure             |                       | Model p-value |
|-----------------------|------------------------|------------------------|-------------------------|-----------------------|---------------|
|                       | SNAP                   | Non-SNAP               | SNAP                    | Non-SNAP              |               |
| Total Score           | 47.9±0.7 <sup>a</sup>  | 51.6±0.9 <sup>b</sup>  | 50.0±0.6 <sup>a,b</sup> | 55.9±0.4 <sup>c</sup> | <.0001        |
| Total Vegetables      | 2.4±0.1 <sup>a</sup>   | 2.9±0.1 <sup>a,b</sup> | 2.6±0.1 <sup>a</sup>    | 3.0±0.0 <sup>b</sup>  | <.0001        |
| Greens & Beans        | 1.2±0.2 <sup>a</sup>   | 1.9±0.2 <sup>a,b</sup> | 1.4±0.1 <sup>a</sup>    | 2.0±0.1 <sup>b</sup>  | <.0001        |
| Total Fruit           | 1.7±0.1 <sup>a</sup>   | 2.2±0.1 <sup>a</sup>   | 2.1±0.1 <sup>a</sup>    | 2.7±0.1 <sup>b</sup>  | <.0001        |
| Whole Fruit           | 1.8±0.1 <sup>a</sup>   | 2.1±0.2 <sup>a,b</sup> | 2.4±0.1 <sup>b</sup>    | 3.0±0.1 <sup>c</sup>  | <.0001        |
| Whole Grains          | 2.0±0.2 <sup>a</sup>   | 2.6±0.3 <sup>a,b</sup> | 2.0±0.2 <sup>a</sup>    | 3.0±0.1 <sup>b</sup>  | <.0001        |
| Total Dairy           | 4.8±0.2 <sup>a</sup>   | 4.9±0.3 <sup>a,b</sup> | 5.3±0.2 <sup>a,b</sup>  | 5.4±0.1 <sup>b</sup>  | 0.009         |
| Total Protein         | 3.6±0.1                | 3.4±0.2                | 3.7±0.1                 | 3.6±0.0               | 0.54          |
| Seafood/Plant Protein | 1.8±0.1 <sup>a</sup>   | 2.1±0.1 <sup>a,b</sup> | 2.1±0.1 <sup>a</sup>    | 2.5±0.1 <sup>b</sup>  | 0.0025        |
| Fatty Acids           | 4.7±0.2                | 5.3±0.3                | 4.9±0.2                 | 5.0±0.1               | 0.4301        |
| Sodium                | 6.5±0.2                | 6.3±0.3                | 6.2±0.2                 | 6.8±0.1               | 0.043         |
| Refined Grains        | 6.3±0.3                | 6.2±0.3                | 6.7±0.2                 | 7.0±0.1               | 0.0103        |
| Saturated Fats        | 5.3±0.3                | 6.1±0.3                | 5.3±0.2                 | 5.7±0.1               | 0.0194        |
| Added Sugar           | 5.8±0.2 <sup>a,b</sup> | 5.6±0.3 <sup>a,b</sup> | 5.4±0.2 <sup>a</sup>    | 6.3±0.1 <sup>b</sup>  | 0.0014        |

Estimates marked with different superscript letters are significantly different at p<0.05.

Abbreviations: Healthy Eating Index (HEI), Supplemental Nutrition Assistance Program (SNAP)

Table S2– Weighted linear regression summaries examining the influence of food insecurity, SNAP participation, household-level obesity, and race/ethnicity on Healthy Eating Index scores in FoodAPS (n=3,960)

| Exposure levels                                 |                                    | Unadjusted model                       |         | Adjusted model                          |         |
|-------------------------------------------------|------------------------------------|----------------------------------------|---------|-----------------------------------------|---------|
|                                                 |                                    | $\beta$ (95% CI)                       | p-value | $\beta$ (95% CI)                        | p-value |
| <b>Food insecurity x SNAP</b>                   |                                    |                                        |         |                                         |         |
|                                                 |                                    | Model p<0.0001 ; R <sup>2</sup> = 3.5% |         | Model p<0.0001 ; R <sup>2</sup> = 11.1% |         |
|                                                 | Food insecure/SNAP participant     | -7.77 (-9.32, -6.23)                   | <0.0001 | -3.56 (-5.63, -1.49)                    | 0.0014  |
|                                                 | Food insecure/non-SNAP participant | -4.12 (-5.99, -2.25)                   | <0.0001 | -1.43 (-3.31, 0.45)                     | 0.1     |
|                                                 | Food secure/SNAP participant       | -5.73 (-7.21, -4.25)                   | <0.0001 | -2.32 (-4.19, -0.46)                    | 0.0169  |
|                                                 | Food secure/non-SNAP participant   | REF                                    |         | REF                                     |         |
| <b>SNAP x household-level obesity</b>           |                                    |                                        |         |                                         |         |
|                                                 |                                    | Model p<0.0001 ; R <sup>2</sup> = 4.2% |         | Model p<0.0001 ; R <sup>2</sup> = 11.6% |         |
|                                                 | SNAP, HH-level obesity             | -7.79 (-9.57, -6.02)                   | <0.0001 | -3.86 (-5.85, -1.87)                    | 0.0004  |
|                                                 | Non-SNAP, HH-level obesity         | -3.29 (-4.90, -1.67)                   | 0.0002  | -2.12 (-3.60, -0.65)                    | 0.006   |
|                                                 | SNAP, no HH-level obesity          | -7.32 (-9.32, -5.33)                   | <0.0001 | -3.26 (-5.40, -1.12)                    | 0.003   |
|                                                 | Non-SNAP, no HH-level obesity      | REF                                    |         | REF                                     |         |
| <b>Race/ethnicity x household-level obesity</b> |                                    |                                        |         |                                         |         |
|                                                 |                                    | Model p<0.0001 ; R <sup>2</sup> = 3.5% |         | Model p<0.0001 ; R <sup>2</sup> = 13.3% |         |
| NHW                                             | no HH-level obesity                |                                        |         |                                         |         |
|                                                 | HH-level obesity                   | -3.12 (-4.87, -1.38)                   | *       | -1.58 (-3.12, -0.03)                    | *       |
| NHB                                             | no HH-level obesity                | -1.02 (-3.86, 1.81)                    | ¶       | 0.71 (-1.96, 3.39)                      |         |
|                                                 | HH-level obesity                   | -6.79 (-10.05, -3.52)                  |         | -3.56 (-6.79, -0.41)                    | *       |
| Hispanic                                        | no HH-level obesity                | -2.45 (-1.96, 3.30)                    | ¶       | -0.19 (-2.91, 2.53)                     |         |
|                                                 | HH-level obesity                   | -1.23 (-0.40, 4.19)                    | §       | 1.99 (-0.61, 4.59)                      | §       |
| Other                                           | no HH-level obesity                | 4.95 (4.33, 11.82)                     | ¶       | 3.84 (0.62, 7.07)                       | ¶       |
|                                                 | HH-level obesity                   | -2.33 (-2.35, 3.93)                    | *§      | -1.02 (-4.25, 2.21)                     | *       |

Unadjusted models are adjusted for age only. Adjusted models contain age as well as the following covariates: 1) food insecurity and SNAP participation – smoking status, poverty income ratio, education, 2) SNAP participation and household-level obesity – smoking status, poverty income ratio, and education, 3) race/ethnicity and household-level obesity – SNAP participation, smoking status, poverty income ratio, education, and self-reported health status.

Abbreviations: Supplemental Nutrition Assistance Program (SNAP), household (HH), non-Hispanic White (NHW), non-Hispanic Black (NHB)

The p-value columns for race/ethnicity x household-level obesity reflect comparisons within racial/ethnic groups (e.g.) where significant differences between HH-level obesity vs non HH-level obesity is denoted with an asterisk; comparisons between groups are reflected with superscripted symbols that indicate significant between-group comparison using NHW as the reference group – i.e. ¶ indicates significantly different from NHW, no HH-level obesity and § indicates significantly different from NHW, HH-level obesity. The linear regression estimates were obtained using NHW, no HH-level obesity as the reference group; within and between group comparisons were obtained using planned contrasts.

Table S3 – Unadjusted model examining mean HEI scores by SNAP and household-level obesity status (n=3957)

| HEI Category          | Household-level obesity |                       | No household-level obesity |                       | Model p-value |
|-----------------------|-------------------------|-----------------------|----------------------------|-----------------------|---------------|
|                       | SNAP                    | Non-SNAP              | SNAP                       | Non-SNAP              |               |
| Total Score           | 48.8±0.7 <sup>a</sup>   | 53.6±0.6 <sup>b</sup> | 49.5±0.8 <sup>a</sup>      | 56.9±0.6 <sup>c</sup> | <.0001        |
| Total Vegetables      | 2.5±0.1 <sup>a</sup>    | 2.8±0.1 <sup>b</sup>  | 2.6±0.1 <sup>a,b</sup>     | 3.2±0.1 <sup>c</sup>  | <.0001        |
| Greens & Beans        | 1.3±0.1 <sup>a</sup>    | 1.7±0.1 <sup>b</sup>  | 1.4±0.1 <sup>a,b</sup>     | 2.2±0.1 <sup>c</sup>  | <.0001        |
| Total Fruit           | 2.0±0.1 <sup>a</sup>    | 2.4±0.1 <sup>b</sup>  | 1.8±0.2 <sup>a</sup>       | 2.7±0.1 <sup>c</sup>  | <.0001        |
| Whole Fruit           | 2.2±0.1 <sup>a</sup>    | 2.8±0.1 <sup>b</sup>  | 2.0±0.2 <sup>a</sup>       | 3.0±0.1 <sup>b</sup>  | <.0001        |
| Whole Grains          | 2.1±0.2 <sup>a</sup>    | 2.8±0.1 <sup>b</sup>  | 2.0±0.2 <sup>a</sup>       | 3.0±0.2 <sup>b</sup>  | <.0001        |
| Total Dairy           | 5.2±0.2                 | 5.4±0.1               | 4.9±0.2                    | 5.3±0.1               | 0.2772        |
| Total Protein         | 3.7±0.1                 | 3.6±0.1               | 3.6±0.1                    | 3.5±0.1               | 0.392         |
| Seafood/Plant Protein | 1.8±0.1 <sup>a</sup>    | 2.3±0.1               | 2.1±0.2                    | 2.5±0.1 <sup>b</sup>  | <.0001        |
| Fatty Acids           | 4.7±0.2                 | 4.9±0.2               | 5.0±0.3                    | 5.1±0.1               | 0.3847        |
| Sodium                | 6.3±0.2                 | 6.7±0.2               | 6.4±0.2                    | 6.8±0.1               | 0.1177        |
| Refined Grains        | 6.4±0.2                 | 6.8±0.1               | 6.7±0.3                    | 6.9±0.1               | 0.3476        |
| Saturated Fats        | 5.1±0.2 <sup>a</sup>    | 5.4±0.2 <sup>a</sup>  | 5.6±0.2                    | 6.1±0.1 <sup>b</sup>  | <.0001        |
| Added Sugar           | 5.6±0.2 <sup>a</sup>    | 6.0±0.2               | 5.4±0.3 <sup>a</sup>       | 6.5±0.1 <sup>b</sup>  | 0.0007        |

Estimates marked with different superscript letters are significantly different at p<0.05.

Abbreviations: Healthy Eating Index (HEI), Supplemental Nutrition Assistance Program (SNAP)

Table S4 – Unadjusted model examining mean HEI scores by race/ethnicity and household-level obesity status (n=3957)

| Category              | Non-Hispanic White |               | Non-Hispanic Black |               | Hispanic   |               | Other      |               | Model p-value |
|-----------------------|--------------------|---------------|--------------------|---------------|------------|---------------|------------|---------------|---------------|
|                       | HH obesity         | No HH obesity | HH obesity         | No HH obesity | HH obesity | No HH obesity | HH obesity | No HH obesity |               |
| Total Score           | 53.0±0.6*          | 56.3±0.6      | 49.0±1.6*§         | 54.9±1.4      | 54.6±1.0   | 53.5±1.3      | 53.5±1.5*  | 60.7±1.5§     | 0.0001        |
| Total Vegetables      | 2.7±0.1*           | 3.1±0.1       | 2.4±0.2            | 2.9±0.2       | 2.9±0.1    | 2.9±0.1       | 2.9±0.3*   | 3.6±0.2§      | <.0001        |
| Greens & Beans        | 1.5±0.1*           | 2.1±0.1       | 1.2±0.2*           | 2.1±0.3       | 2.1±0.1§   | 2.2±0.2       | 2.3±0.3§   | 2.6±0.2       | <.0001        |
| Total Fruit           | 2.3±0.1*           | 2.7±0.1       | 2.1±0.2            | 2.2±0.3       | 2.8±0.1§   | 2.4±0.2       | 2.5±0.2*   | 3.2±0.2§      | 0.0003        |
| Whole Fruit           | 2.7±0.1*           | 2.9±0.1       | 2.1±0.3§           | 2.2±0.3§      | 3.1±0.1§   | 2.9±0.2       | 2.8±0.3*   | 3.6±0.2§      | 0.0003        |
| Whole Grains          | 2.9±0.2            | 3.1±0.3       | 2.0±0.4§           | 2.9±0.3       | 2.3±0.2§   | 2.3±0.3       | 2.3±0.4    | 2.2±0.4       | 0.0227        |
| Total Dairy           | 5.6±0.2            | 5.7±0.1       | 4.4±0.3*§          | 3.2±0.3§      | 5.3±0.2*   | 4.4±0.4§      | 4.7±0.5    | 4.7±0.4       | <.0001        |
| Total Protein         | 3.5±0.1            | 3.5±0.1       | 3.9±0.1§           | 3.4±0.2       | 3.8±0.1    | 3.7±0.2       | 3.4±0.3    | 3.5±0.2       | 0.0817        |
| Seafood/Plant Protein | 2.2±0.1            | 2.4±0.1       | 2.1±0.2            | 2.4±0.2       | 2.3±0.1    | 2.4±0.2       | 2.2±0.3    | 3.0±0.3       | 0.2998        |
| Fatty Acids           | 4.9±0.2            | 4.8±0.1       | 5.0±0.4*           | 6.7±0.4§      | 4.9±0.4    | 5.3±0.4       | 5.0±0.4    | 5.4±0.4       | 0.0254        |
| Sodium                | 6.4±0.2            | 6.6±0.1       | 6.3±0.4*           | 7.3±0.3§      | 7.4±0.2§   | 6.6±0.4       | 7.5±0.5§   | 7.7±0.3§      | <.0001        |
| Refined Grains        | 7.0±0.1            | 6.9±0.2       | 6.6±0.3            | 7.0±0.4       | 5.9±0.3§   | 6.2±0.3       | 6.6±0.4    | 7.5±0.3       | 0.0044        |
| Saturated Fats        | 5.2±0.2*           | 5.8±0.2       | 5.3±0.3*           | 7.0±0.3§      | 5.6±0.2    | 6.5±0.4       | 5.9±0.5    | 6.5±0.5       | <.0001        |
| Added Sugar           | 6.0±0.2            | 6.4±0.2       | 5.6±0.2            | 5.6±0.4       | 6.3±0.3    | 5.8±0.4       | 5.2±0.5*   | 7.3±0.4§      | 0.0003        |

\* Designates significant differences between households with and without obesity within the racial/ethnic group

§ Designates significantly different from the non-Hispanic White referent groups

Abbreviations: household (HH), Healthy Eating Index (HEI), Supplemental Nutrition Assistance Program (SNAP)
